# Supplementary material for: A facile and green strategy for the synthesis of MoS2 nanospheres with excellent Li-ion storage properties
Source: Royal Society of Chemistry journal article supplement (doi:10.1039/c2ce26447a), 2012-01-01
Supplement: c2ce26447a.pdf [file c2ce26447a.pdf]

## Electronic Supplementary Information

### **A Facile and green strategy for the synthesis of MoS<sub>2</sub> nanospheres with excellent Li-ion storage properties**

Seung-Keun Park,<sup>a</sup> Seung-Ho Yu,<sup>b</sup> Seunghye Woo,<sup>c</sup> Jeonghyun Ha,<sup>a</sup> Junyoung Shin,<sup>b</sup> Yung-Eun Sung<sup>\*b</sup> and Yuanzhe Piao<sup>\*ad</sup>

<sup>a</sup>Department of Nano Science and Technology, Graduate School of Convergence Science and Technology, Seoul National University, Suwon 443-270, Republic of Korea. Fax: +82-31-8889148; Tel: +82-31-8889141; E-mail: [parkat9@snu.ac.kr](mailto:parkat9@snu.ac.kr)

<sup>b</sup> World Class University (WCU) program of Chemical Convergence for Energy & Environment (C2E2), School of Chemical and Biological Engineering, College of Engineering, Seoul National University, Seoul 151-744, Republic of Korea. E-mail : [ysung@snu.ac.kr](mailto:ysung@snu.ac.kr)

<sup>c</sup> Department of Chemistry, Seoul National University, Seoul 151-747, Republic of Korea.

<sup>d</sup> Advanced Institutes of Convergence Technology, Suwon 443-270, Republic of Korea.

## Experimental Details

*Synthesis of MoS<sub>2</sub> nanospheres:* 6 mmol of sodium molybdate dihydrate were dissolved in 50 ml deionized (DI) water for 2 min. Then, 25 mmol of L-cysteine was added to the solution followed by sonication for 30 min. Next, 10 M HCl was added to the solution drop by drop until the pH value of the solution was less than 1. After 15 min of stirring, the mixture was transferred into a Teflon-lined stainless steel autoclave and reacted at 220 °C for 36 h. After the autoclave cooled down to room temperature, the product was washed with DI water and absolute ethanol several times, and then dried at 80 °C for 12 h. Finally, the product was annealed at 800 °C for 2 h in an atmosphere of H<sub>2</sub> (5%) and balanced by N<sub>2</sub> to obtain high-crystallinity products and remove impurities.

*Characterizations:* X-Ray powder diffraction (XRD) patterns were obtained on a Bruker D-5005 with Cu K $\alpha$  radiation ( $\lambda = 1.5406 \text{ \AA}$ ) at 40 kV and 40 mA with a scan range of 5°~65°. Sample morphologies were characterized by carrying out field emission scanning electron microscopy (FE-SEM, Hitachi S-4800). A JEM-2010 transmission electron microscope (TEM) equipped with a field emission gun and operated at 200 kV was used for high-resolution TEM measurements.

*Electrochemical measurements:* The prepared MoS<sub>2</sub> nanospheres and nanosheets were mixed with polyvinylidene fluoride and Super P in a weight ratio of 70: 15: 15. This resulting mixture was dispersed in *N*-methyl pyrrolidone. The obtained slurry was casted on copper foil and dried in oven. The electrode was pressed to enhance the particle contact. The 2016 coin-type cells were assembled in argon filled glove box. Lithium foil was used as counter and reference electrodes and 1.0 M LiPF<sub>6</sub> dissolved in a mixture of ethylene carbonate and diethyl carbonate (1:1 in volume ratio) was used as electrolyte. The voltage window for electrochemical testing was between 0.01 and 3.0 V versus Li/Li<sup>+</sup>.

Cyclic voltammetry (CV) was carried out at a scan rate of  $0.1 \text{ mVs}^{-1}$ . All electrochemical measurements were made at room temperature with a WBCS3000 cyler (WonA Tech, Korea).

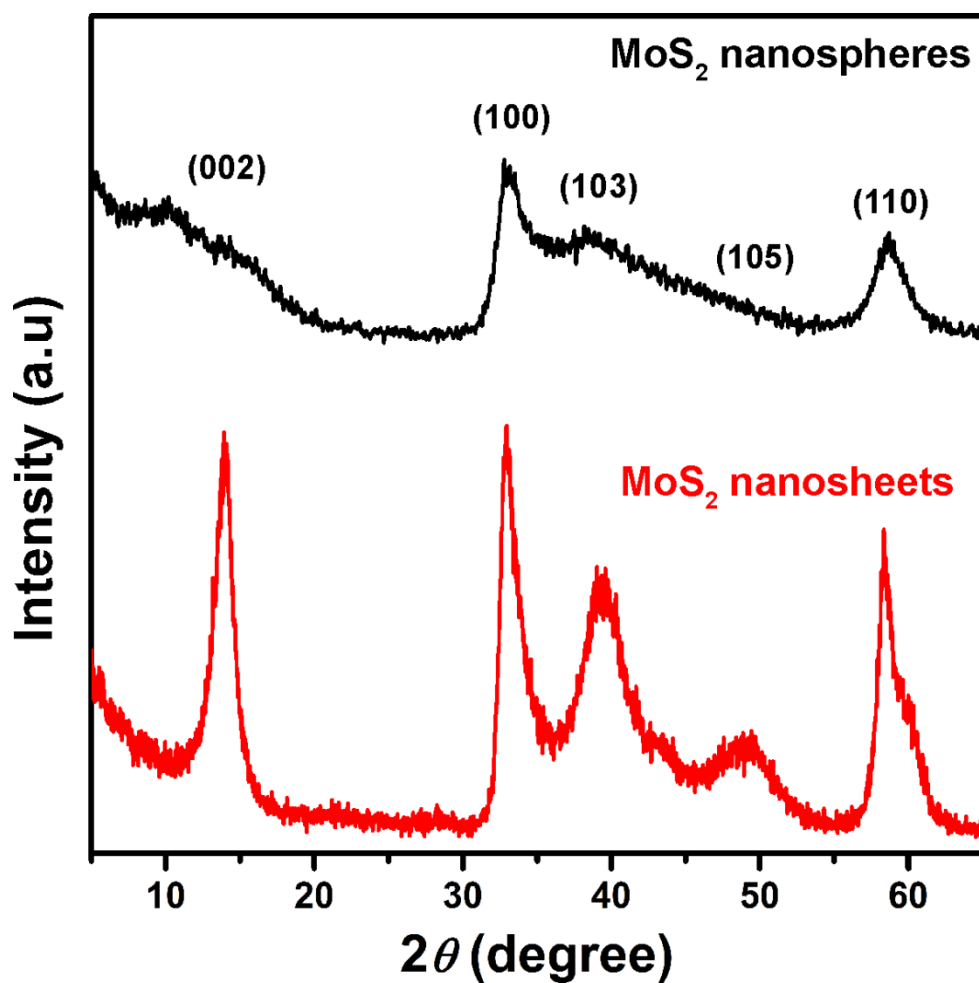

**Fig. S1** XRD patterns of MoS<sub>2</sub> nanospheres and nanosheets (MoS<sub>2</sub> nanospheres and nanosheets were annealed at 800 °C for 2 h in an atmosphere of H<sub>2</sub> (5%) and balanced by N<sub>2</sub> to obtain high-crystallinity products and remove impurities).

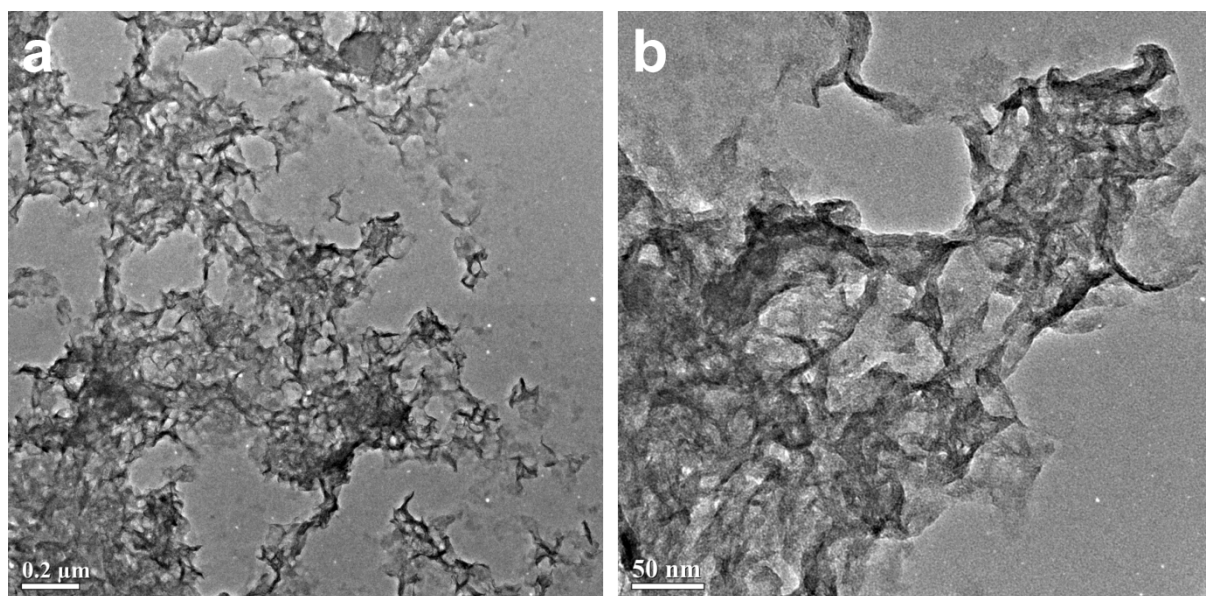

**Fig. S2** TEM images of the MoS<sub>2</sub> synthesized in the solution with the pH of 7.
